# Supplementary material for: A facile band alignment of polymeric carbon nitride isotype heterojunctions for enhanced photocatalytic tetracycline degradation
Source: Royal Society of Chemistry journal article supplement (doi:10.1039/c8en00807h), 2018-01-01
Supplement: c8en00807h1.pdf [file c8en00807h1.pdf]

## Supporting Information

### **A Facile Band Alignment of Polymeric Carbon Nitride Isotype Heterojunctions for Enhanced Photocatalytic Tetracycline Degradation**

Longbo Jiang <sup>a</sup>, Xingzhong Yuan <sup>a\*</sup>, Guangming Zeng <sup>a</sup>, Jie Liang <sup>a\*</sup>, Zhibin Wu <sup>b</sup>,  
Hou Wang <sup>a</sup>, Jin Zhang <sup>a</sup>, Ting Xiong <sup>a</sup>, Hui Li <sup>c</sup>

*a. College of Environmental Science and Engineering, Hunan University and Key Laboratory of Environmental Biology and Pollution Control (Hunan University), Ministry of Education, Changsha 410082, P.R. China*

*b. College of Bioscience and Biotechnology, Hunan Agricultural University, Changsha, Hunan, 410128, PR China*

*c. Institute of Biological and Environmental Engineering, Hunan Academy of Forestry, Changsha 410004, P.R. China*

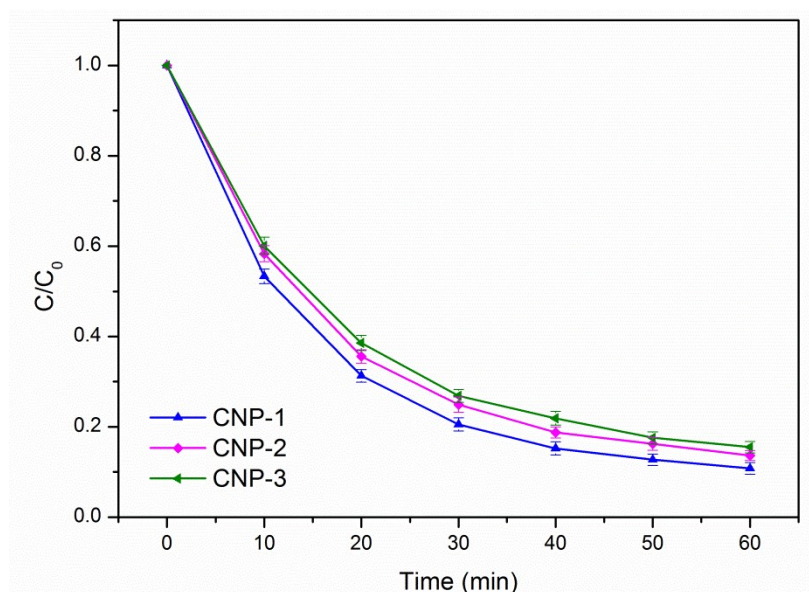

Fig. S1 The photocatalytic TC degradation of PCN/CN composites with error bars.

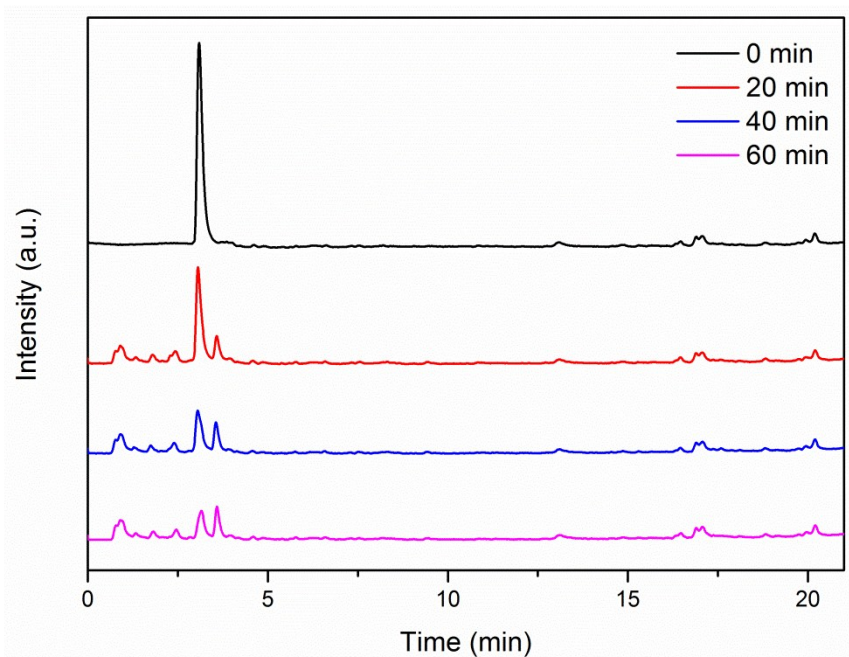

Fig. S2 HPLC spectra of the TC at different reaction time.

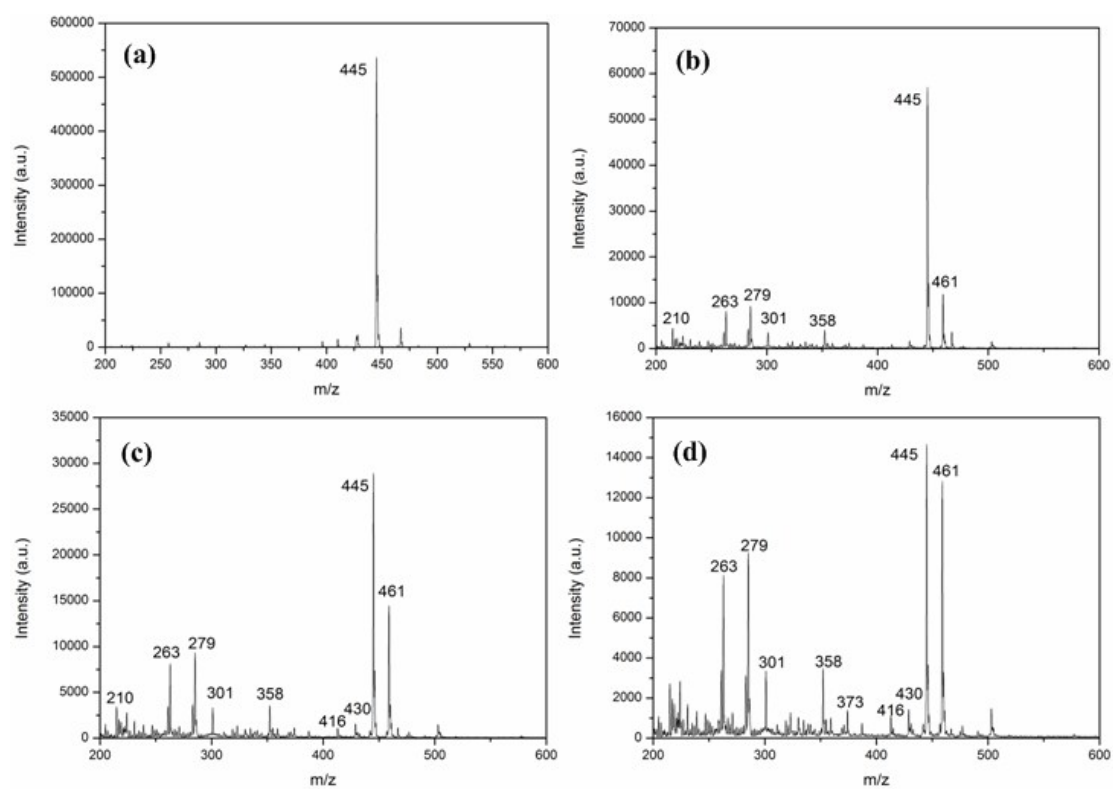

Fig. S3 MS spectra of the TC and possible intermediated at different reaction time of (A) 0 min; (B) 20 min; (C) 40 min; and (D) 60 min.

Table S1. The possible intermediates products of TC degradation.

| <i>m/z</i> | Proposed structure                                                                  | <i>m/z</i> | Proposed Structure                                                                    |
|------------|-------------------------------------------------------------------------------------|------------|---------------------------------------------------------------------------------------|
| 445        | 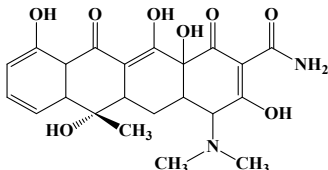   | 358        |    |
| 461        |    | 301        |    |
| 430        |    | 279        |    |
| 416        |   | 263        |   |
| 373        |  | 210        |  |

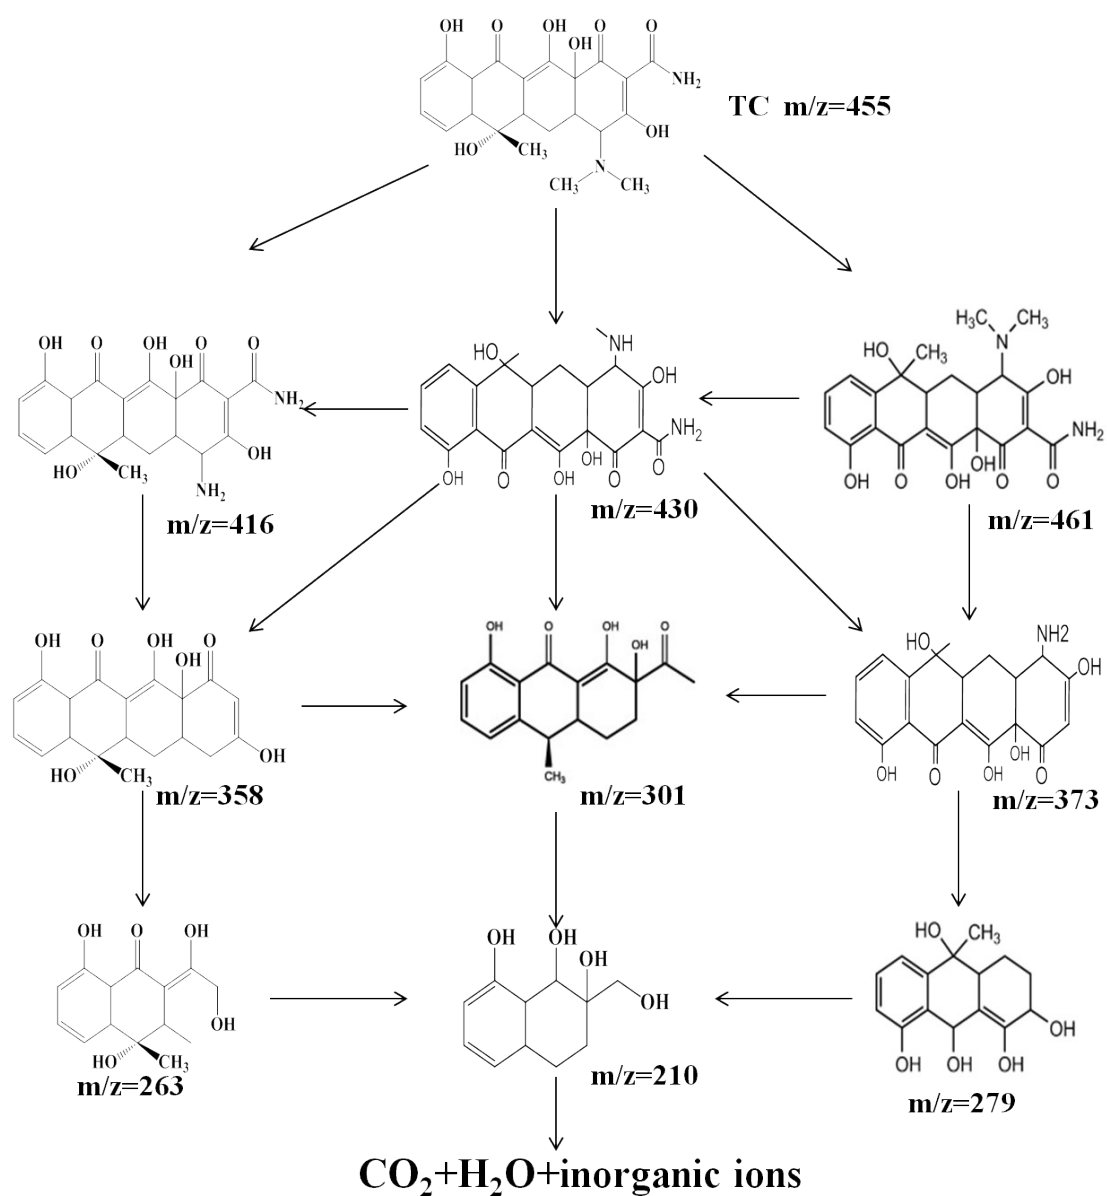

Fig. S4. Proposed photocatalytic degradation pathway of TC by PCN/CN composite.
